# Supplementary material for: Evolution and Functional Characteristics of the Novel elovl8 That Play Pivotal Roles in Fatty Acid Biosynthesis
Source: MDPI journal article supplement (doi:10.3390/genes12081287), 2021-08-23
Supplement: s1 [file s1]

**Title: Evolution and Functional Characteristics of the Novel Elovl8 Which Play Pivotal Roles in Fatty Acid Biosynthesis**

Shouxian Sun<sup>1,2†</sup>, Yumei Wang<sup>1†</sup>, Pei-Tian Goh<sup>3</sup>, Mónica Lopes-Marques<sup>4</sup>, L. Filipe C. Castro<sup>4,5</sup>, Óscar Monroig<sup>6</sup>, Meng-Kiat Kuah<sup>3</sup>, Xiaojuan Cao<sup>1,2</sup>, Alexander Chong Shu-Chien<sup>3\*</sup>, Jian Gao<sup>1,2\*</sup>

1. Key Lab of Freshwater Animal Breeding, College of Fisheries, Ministry of Agriculture, Huazhong Agricultural University, Wuhan 430070, China; ssx0707@webmail.hzau.edu.cn (S.S.); YumeiWang@webmail.hzau.edu.cn (Y.W.); caoxiaojuan@mail.hzau.edu.cn (X.C.)
- 2 Ministry of Education/Hubei Provincial Engineering Laboratory for Pond Aquaculture, Engineering Research Center of Green development for Conventional Aquatic Biological Industry in the Yangtze River Economic Belt, College of Fisheries, Huazhong Agricultural University, Wuhan 430070, China
- 3 Center for Chemical Biology, Universiti Sains Malaysia, Penang 11800, Malaysia; gohpeitian@gmail.com (P.-T.G.); kuahmk@gmail.com (M.-K.K.)
- 4 CIIMAR/CIMAR—Interdisciplinary Center of Marine and Environmental Research, University of Porto, Porto 4099002, Portugal; monicaslm@hotmail.com (M.L.-M.); filipe.castro@ciimar.up.pt (L.F.C.C.)
- 5 Department of Biology, Portugal/FCUP—Faculty of Sciences, University of Porto, Porto 4099002, Portugal
- 6 Instituto de Acuicultura Torre de la Sal (IATS-CSIC), Ribera de Cabanes, Castellon 12595, Spain; [oscar.monroig@csic.es](mailto:oscar.monroig@csic.es)

<sup>†</sup> These two authors contributed equally to this work and should be considered co-first authors

\*Corresponding author

Email address: [gaojian@mail.hzau.edu.cn](mailto:gaojian@mail.hzau.edu.cn) (J. Gao)

Postal address: No.1 Shizishan Stress, Hongshan District, Wuhan 430070, Hubei Province, China

Email address: [alex@usm.my](mailto:alex@usm.my) (Shu-Chien AC)

Postal address: Center for Chemical Biology, Universiti Sains Malaysia, 11800, Minden, Penang, Malaysia.

**Figure S1-S5**

**Table S1**

A

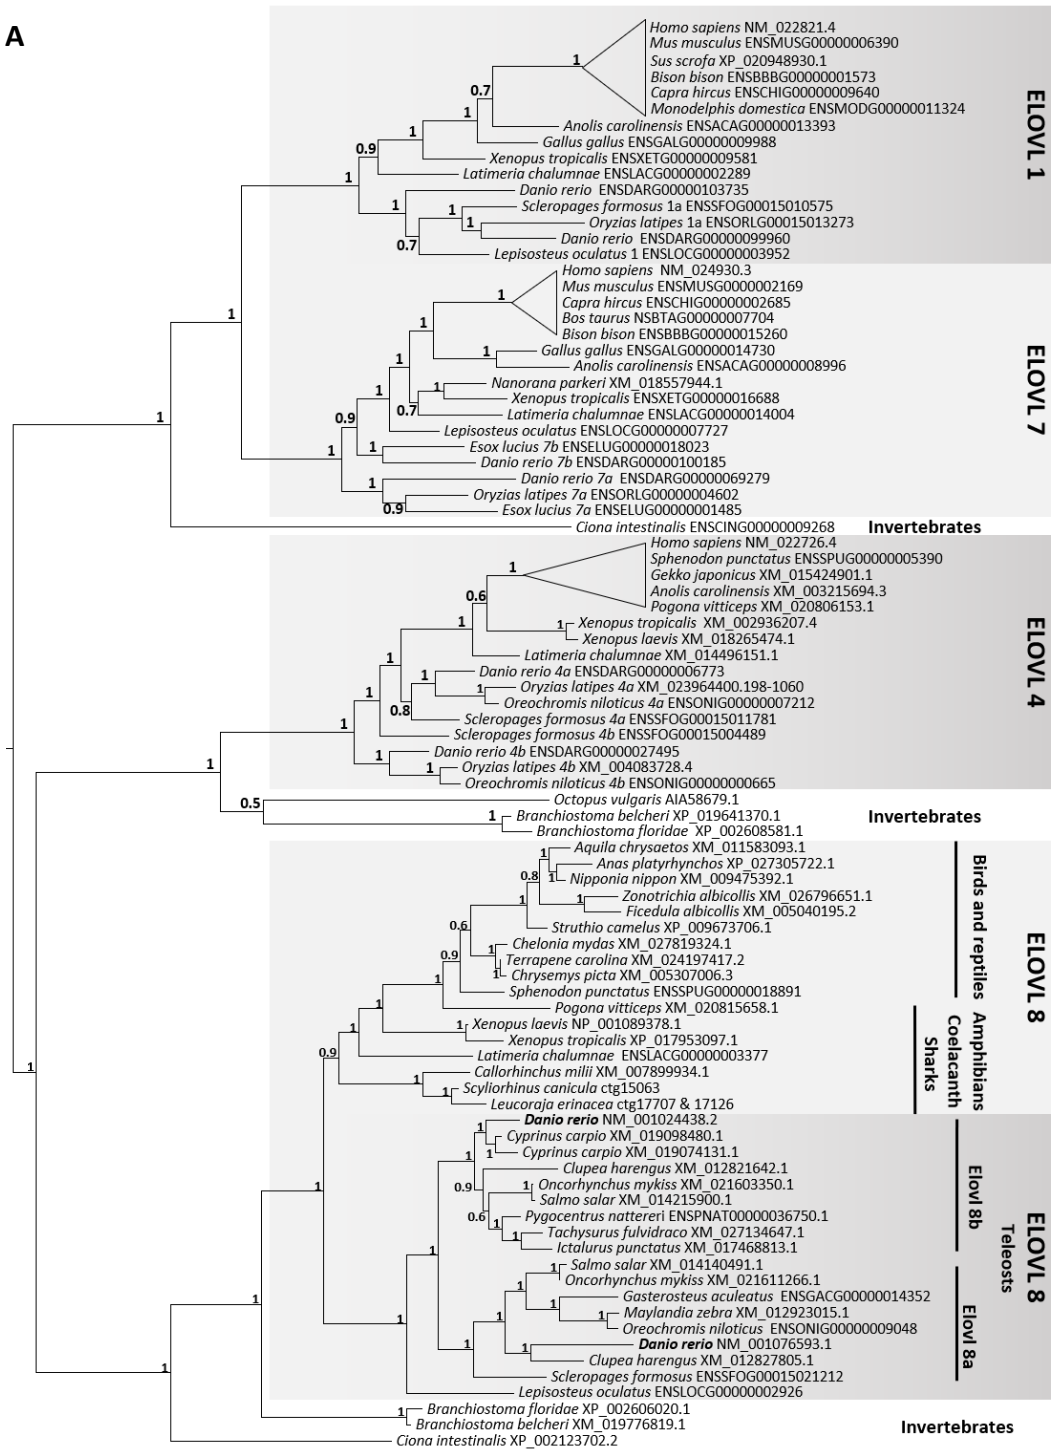

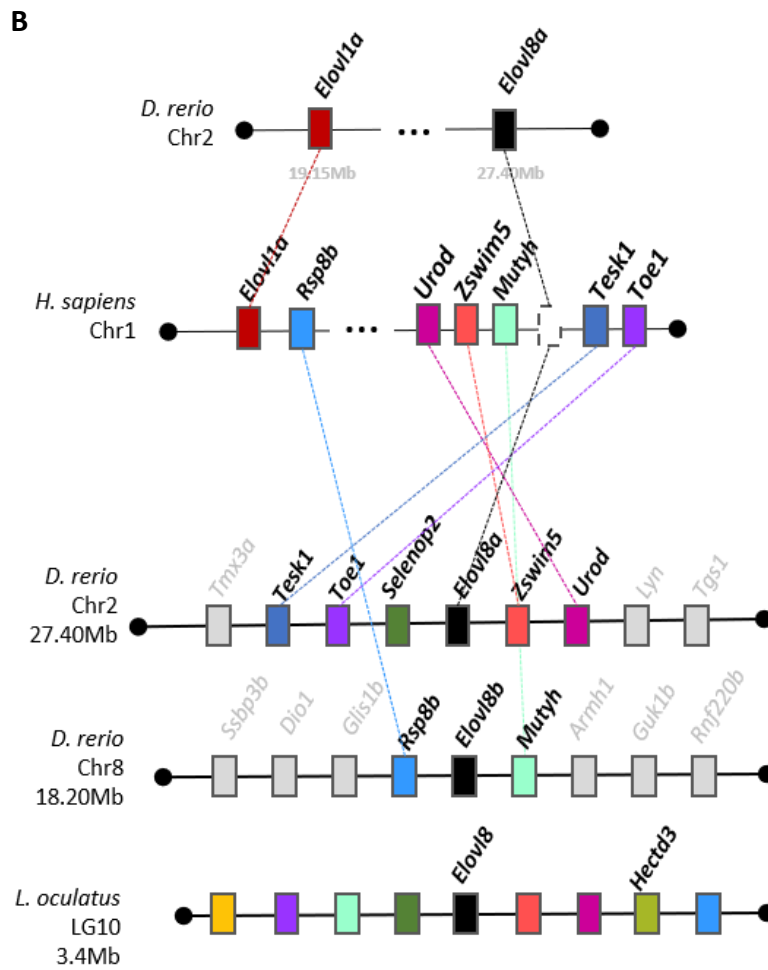

**Figure S1. Phylogenetic analysis and synteny maps of Elov18.**

(A) Phylogenetic analysis of Elov11, Elov17 Elov14 and Elov18 sequences, values at node correspondent to posterior probabilities provided by aBayes. Tree was rooted at midpoint. (B) Syntenic location of the Elov18 genes in several species; Elov18 gene is represented by black box; dotted black box in human represents a pseudogene; color code of the remaining boxes is conserved corresponding to the same gene identified in several species. Genes identified in grey show no conservation with the remaining genes.

Elov1: elongation of very long-chain fatty acid protein.

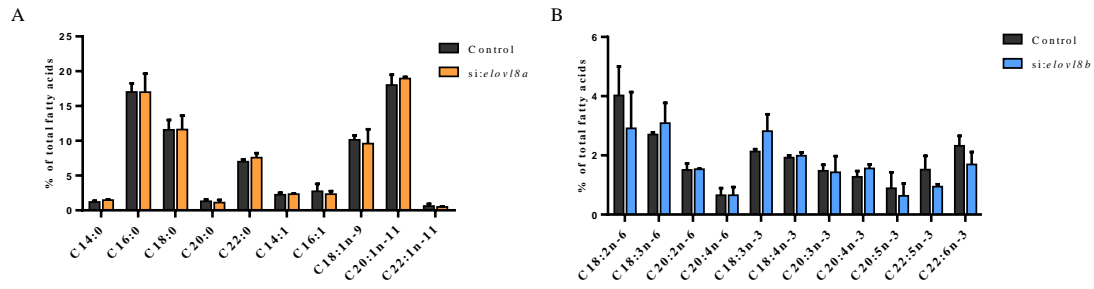

**Figure S2. Effects of *elovl8a* and *elovl8b* knockdown on liver fatty acid composition.** (A) SFA and MUFA composition of control and si:*elovl8a* treated ZFL cells. (B) PUFA composition of control and si:*elovl8b* treated ZFL cells.

*elovl*, elongation of very long-chain fatty acid protein; SFA, saturated fatty acid; MUFA, monounsaturated fatty acids; PUFA, polyunsaturated fatty acids.

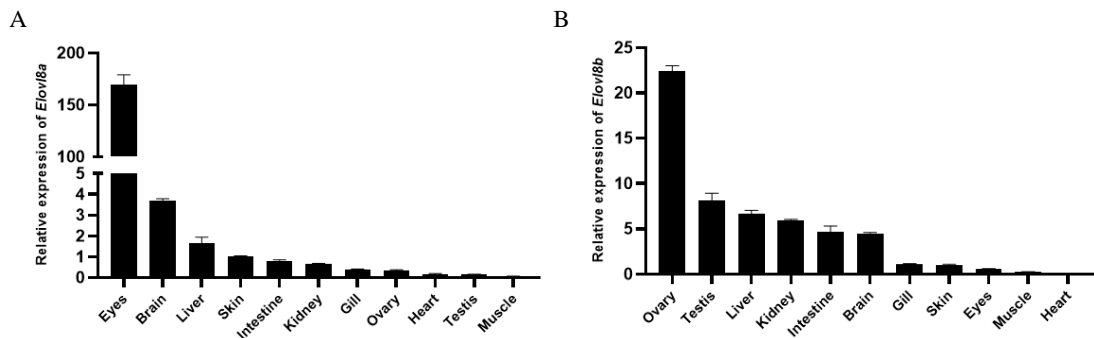

**Figure S3. Relative mRNA expression levels of *elovl8a* (A) and *elovl8b* (B) in different tissues of wild-type zebrafish.** Data were expressed as mean  $\pm$  SD of three biological replicates.

A

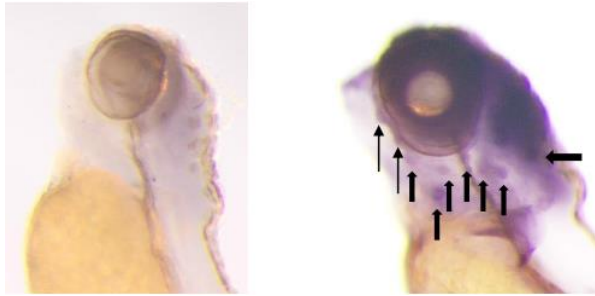

B.

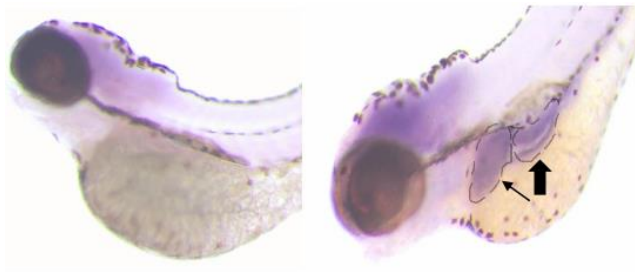

**Figure S4.** Expression of *elovl8a* (A) and *elovl8b* (B) in 96hpf zebrafish. Images on left showed fish labeled with sense riboprobe as negative control. For *elovl8a*, expression was prominent in eyes (arrow) and head neuromasts (bold arrow). As for *elovl8b*, expression was detected in the developing liver (arrow) and intestine (bold arrow). *elovl*, elongation of very long-chain fatty acid protein; hpf, hours post-fertilization.

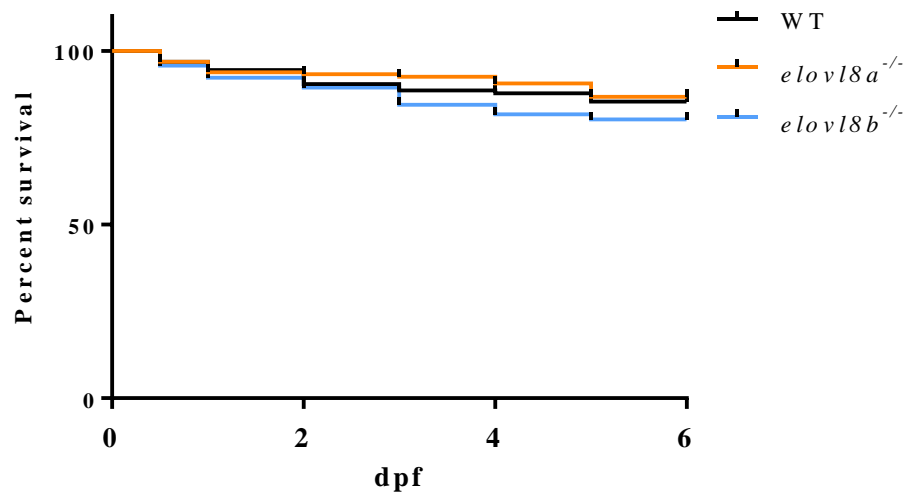

**Figure S5.** Survival rates of the wild-type (WT), *elovl8a*<sup>-/-</sup> and *elovl8b*<sup>-/-</sup> early embryo stage. *elovl*, elongation of very long-chain fatty acid protein; dpf, days post-fertilization.

**Table S1. The primers of PCR used in this study.**

| Target gene primers                                   | Primer sequences (5´-3´) | Accession numbers |
|-------------------------------------------------------|--------------------------|-------------------|
| Construction of knockout models                       |                          |                   |
| <i>elovl8a</i> -F                                     | GGTCTGAATTGCTTTCTTC      | ID: 767653        |
| <i>elovl8a</i> -R                                     | ATGTTTTTATTTGTCTATGGTC   |                   |
| <i>elovl8b</i> -F                                     | ATAGATCTGTGTACTTCTGCA    | ID: 554145        |
| <i>elovl8b</i> -R                                     | CAGTCCTTTTAGGTTCACTGGT   |                   |
| qPCR                                                  |                          |                   |
| <i>elovl2</i> -F                                      | GTTTTTCAGCTGTCCCGTA      | NM_001040362.1    |
| <i>elovl2</i> -R                                      | ATTGGAATGACTGTGTTTAGG    |                   |
| <i>elovl5</i> -F                                      | CCAAGGACAGGACGAAGC       | NM_200453.2       |
| <i>elovl5</i> -R                                      | CAGTGTGCAAACGTGTAAGGA    |                   |
| <i>elovl4a</i> -F                                     | GTCATTCTTCGGGGCTCACA     | NM_200796.1       |
| <i>elovl4a</i> -R                                     | CCGATCAGACACCAGTGCAT     |                   |
| <i>elovl4b</i> -F                                     | CTTTGATTGGCTATGCCGTTAC   | NM_199972.1       |
| <i>elovl4b</i> -R                                     | CGTGCTTTTCCTTTTCCTTTCTT  |                   |
| <i>elovl5</i> -F                                      | CCAAGGACAGGACGAAGC       | NM_200453.2       |
| <i>elovl5</i> -R                                      | CAGTGTGCAAACGTGTAAGGA    |                   |
| <i>elovl7a</i> -F                                     | TGTATGGCATCATCTTCCTCCT   | NM_199875.1       |
| <i>elovl7a</i> -R                                     | GCAGTCGGCAGAGTAACCT      |                   |
| <i>elovl7b</i> -F                                     | GCGGTTCTGCTGTATGATGAG    | NM_199778.1       |
| <i>elovl7b</i> -R                                     | ACGATGCTGAGGTTGTAGATGA   |                   |
| <i>elovl8a</i> -F                                     | ACGGAGACAAGAGGACAGATG    | NM_001076593.1    |
| <i>elovl8a</i> -R                                     | TGCCAACCAAGAGGAGACTG     |                   |
| <i>elovl8b</i> -F                                     | AATCCGCATGGCAGAGACT      | NM_001024438.2    |
| <i>elovl8b</i> -R                                     | CCAAGATGTGACAAGGAACTCA   |                   |
| <i>gapdh</i> -F                                       | TCCAGTACGACTCCACCCAT     | NM_001115114.1    |
| <i>gapdh</i> -R                                       | TGACTCTCTTTGCACCACCC     |                   |
| $\beta$ -actin-F                                      | CACCACCACAGCCGAAAGAG     | AF057040.1        |
| $\beta$ -actin-R                                      | ACCGCAAGATTCCATACCCA     |                   |
| Primers for in situ hybridization riboprobe synthesis |                          |                   |
| <i>elovl8a</i> -F                                     | GAGACAAGAGGACAGATGGATG   |                   |
| <i>elovl8a</i> -R                                     | CTAGCTTGGTCTTCTTGGAGAG   |                   |
| <i>elovl8b</i> -F                                     | CCCATGGCTACTAGTCTACTC    |                   |
| <i>elovl8b</i> -R                                     | AGCTGGACATTTACCTCTCTC    |                   |
| <i>elovl8a</i> and <i>elovl8b</i> knockdown           |                          |                   |
| si: <i>elovl8a</i>                                    | GGAUGGCUGUUGGUUUAUUTT    |                   |
| si: <i>elovl8b</i>                                    | GGAUCGGACCCAAGCUUAUTT    |                   |

Elov1, elongases of very long-chain fatty acids; *gapdh*: glyceraldehyde-3-phosphate

dehydrogenase.
